1 **One size does not fit all: Caste and sex differences in**  
2 **the response of bumblebees (*Bombus impatiens*) to**  
3 **chronic oral neonicotinoid exposure.**

4

5

6

7

8 **Authors:** Melissa W. Mobley<sup>1</sup> and Robert J. Gegear<sup>1,\*</sup>

9

10

11

12

13

14

15

16

17 **Affiliation:**

18

19 1. Department of Biology and Biotechnology, Worcester Polytechnic Institute,  
20 Worcester, 01609-2280, U.S.A

21 \*, Corresponding author. Email: [rgegear@wpi.edu](mailto:rgegear@wpi.edu)

22

23

## 24 **Abstract**

25 Neonicotinoid insecticides have been implicated in the rapid global decline of bumblebees over  
26 recent years, particularly in agricultural and urban areas. While there is much known about  
27 neonicotinoid toxicity effects at the colony stage of the bumblebee annual cycle, far less is known  
28 about such effects at other stages critical for the maintenance of wild populations. In the present  
29 work, individual-based feeding assays were used to show that chronic consumption of the widely  
30 used neonicotinoid clothianidin at a field-realistic average rate of 3.6 and 4.0 ng/g·bee/day  
31 reduces survival of queen and male bumblebees, respectively, within a 7-day period whereas  
32 consumption at a similar rate of 3.9 ng/g·bee/day in workers had no effect on survival. To test  
33 the hypothesis that males have a lower tolerance for oral clothianidin exposure than workers due  
34 to their haploid genetic status, RNAseq analysis was used to compare the transcriptomic  
35 responses of workers and males to chronic intake of clothianidin at a sub-lethal dose of  
36 0.37ng/day for 5 days. Surprisingly, only 25/100 clothianidin-induced putative detoxification  
37 genes had expression levels that differed in a sex-specific manner, with 17 genes showing  
38 increased expression in workers. Sub-lethal clothianidin intake also induced changes in genes  
39 associated with a variety of other major biological functions, including locomotion, reproduction,  
40 and immunity. Collectively, these results suggest that chronic oral toxicity effects of  
41 neonicotinoids are greatest during mating and nest establishment phases of the bumblebee life  
42 cycle. Chronic oral toxicity tests on males and queens are therefore required in order to fully  
43 assess the impact of neonicotinoids on wild bumblebee populations.

44

45

## 46 Introduction

47 Bumble bees have rapidly declined in abundance, species richness, and geographic  
48 distribution on a global scale over recent years [1, 2]. In North America alone, nearly half of the  
49 bumblebee species have reached historically low numbers [3-5], including one species, *Bombus*  
50 *affinis*, which was recently listed as an endangered species by the U.S. Fish and Wildlife Service.  
51 From an ecological perspective, these declines pose a significant threat to the function and  
52 diversity of temperate ecosystems due to the critical keystone role that bumblebees play as  
53 pollinators of native flowering plants. Reports of parallel reductions in bee-pollinated plant species  
54 suggest that pollinator decline-mediated effects on wildlife diversity at higher trophic levels may  
55 already be well underway [1, 6, 7]. It is therefore imperative that all anthropogenic stressors  
56 contributing to species decline in bumblebees be identified and mitigated as soon as possible.

57 One stressor thought to contribute to wild bumblebee decline in urban and agricultural  
58 areas is a newly developed class of pesticides called ‘neonicotinoids’ [8]. From a pest  
59 management perspective, neonicotinoids are a highly effective form of insect control because  
60 they specifically target nicotinic acetylcholine receptors in the insect central nervous system,  
61 leading to paralysis and death [9]. Unlike most other pesticide classes, neonicotinoids are also  
62 systemic, meaning that they are readily taken up by the roots and distributed throughout the entire  
63 plant, thereby protecting it from pest damage over the entire growing season [10].

64 Despite these benefits, neonicotinoids pose a significant threat to beneficial insects such  
65 as pollinators because they are also translocated to floral nectar and pollen, presenting a route of  
66 oral exposure. Of particular concern to wild pollinator populations is the fact that neonicotinoids  
67 can be transported away from the area of application to adjacent natural areas [11, 12] and then  
68 contaminate wildflower resources [2, 13, 14]. For example, clothianidin, one of the newest and  
69 most potent neonicotinoid formulations, has been detected in numerous wildflower species  
70 heavily visited by insect pollinators at concentrations ranging from 4 to 215 ppb [2, 14].

71 Compounding this issue, neonicotinoid residues can persist in the soil for years after a single  
72 application [15-17], and increase in concentration with repeated annual application [18]. Wild  
73 bumblebees and other insect pollinators therefore have the potential to be orally exposed to  
74 neonicotinoids at many life stages occurring outside of the blooming period and geographic  
75 location of the targeted plant species.

76 Yet, the overwhelming majority of neonicotinoid toxicity studies on bumblebees to date  
77 have focused only on the colony stage, relying on metrics such as worker survival, larval growth,  
78 and reproductive output to estimate the potential impact of exposure on wild populations [19].  
79 While such colony-focused risk assessment protocols may be adequate in the context of crop  
80 pollination, determining the impact of widespread neonicotinoid use on threatened bumblebee  
81 species in an ecological context requires more comprehensive assessment protocols that  
82 consider potential impacts on queens and males, whose survival during mating, overwintering,  
83 and nest establishment stages of the life cycle has a direct effect on population stability (Fig 1).

84

85 **Fig 1. Annual cycle of social bumblebees.** (1) Mated queens emerge from their overwintering  
86 site in the spring and forage while search for a suitable nest site. (2) Queens collect floral  
87 resources and store them in the nest until the first brood of worker bees emerges. (3) Workers  
88 forage for the colony so that it can continue to produce more workers and later, queens and males  
89 (reproductives). (4) Virgin queens and males leave the nest to feed and search for mates. Once  
90 mated, queens, which are the only individuals to survive through the winter months, continue to  
91 feed until they find a suitable overwintering site where they reside until the spring, thus completing  
92 the cycle.

93

94 Several morphological and physiological characteristics of queen, worker, and male  
95 bumblebees suggest that individuals from each group may vary in their capacity to cope with  
96 chronic oral neonicotinoid exposure. For example, males and workers have a smaller body size

97 than queens and therefore may experience mortality effects at lower neonicotinoid  
98 concentrations, as has been shown at the species level [20]. Males are also haploid whereas  
99 queens and workers are diploid, which may limit gene products available for males to detoxify  
100 neonicotinoids. Such ‘haploid susceptibility’ is known to occur in the context of  
101 immunocompetence [21], but has yet to be studied in the context of metabolic resistance to  
102 pesticides. Alternatively, males and queens have greater energetic demands due to their  
103 reproductive status [22, 23] and therefore may have fewer resources available for detoxification  
104 processes than sterile workers .

105 To explore these possibilities, the present study uses a novel individual-based feeding  
106 assay to directly compare the mortality response of queen, worker, and male *Bombus impatiens*  
107 to chronic consumption of the widely used neonicotinoid clothianidin at field-realistic  
108 concentrations of 5-10ppb. Assaying bumblebee test populations at the individual level provides  
109 a much more robust estimate of chronic lethality level than more traditional assays on small  
110 groups (e.g. microcolonies) because drug intake rates can be directly monitored in all test  
111 individuals and then easily standardized by adjusting for individual variation in body size [24]. Our  
112 feeding experiments revealed that chronic lethality effects of clothianidin are much greater in  
113 males than workers even when controlling for differences in body size. To test the potential role  
114 of male haploidy in driving this sex difference, we then used RNAseq analysis to compare the  
115 transcriptomic responses of workers and males to consumption of clothianidin at a sub-lethal daily  
116 dose over a 5-day period. Following previous work on bumblebees by [25], putative genes related  
117 to clothianidin detoxification were identified and classified based on the two well-characterized  
118 xenobiotic detoxification phases in insects, with Phase 1 processes metabolizing the xenobiotic  
119 to less toxic compounds through oxidation, hydrolysis, and reduction reactions, and Phase 2  
120 processes breaking down the metabolites produced from Phase 1 processes through conjugation  
121 reactions. Based on the findings of [25] that another bumblebee species (*B. huntii*) has fewer  
122 constitutively expressed detoxification genes than workers, it was predicted that male *Bombus*

123 *impatiens* would have fewer and/or lower expression of inducible detoxification genes compared  
124 to workers.

125

## 126 **Results**

### 127 **Chronic oral toxicity effects of clothianidin differ among queen, worker,** 128 **and male bumblebees**

129 Chronic consumption of clothianidin at field-realistic concentrations increased mortality rates in  
130 queen, worker, and male test populations (Fig 2). However, clothianidin concentrations needed  
131 to produce such effects varied in a caste- and sex-dependent manner. Table 1 shows intake  
132 rates reducing survival in queens, workers, and males controlling for differences in body size and  
133 daily clothianidin dose. Compared to 0ppb controls, queens consuming clothianidin at a  
134 concentration of 10ppb (mean intake rate  $\pm$  SD = 3.61 $\pm$ 0.71 ng/g·bee/day) had reduced survival  
135 over the 7-day test period ( $X^2=15.6$ , df=1,  $P<0.0001$ ). While workers orally exposed to clothianidin  
136 at a concentration of 10ppb (mean intake rate  $\pm$  SD = 5.48 $\pm$ 1.95 ng/g·bee/day) also had reduced  
137 survival ( $X^2=54.7$ , df=1,  $P<0.0001$ ), with the test population reaching 50% mortality at day 5.  
138 Interestingly, worker consumption mean ( $\pm$ SD) intakes rates of 3.85 ( $\pm$ 1.6) ng/g·bee/day (7ppb  
139 solution) had no effect of survival, indicating that workers are better able to cope with chronic oral  
140 clothianidin exposure than queens when controlling for consumption rate and body size.

141

142 **Fig 2. Kaplan-Meier survival plots for *Bombus impatiens* (A) queens, (B) workers, and (C)**  
143 **males, orally exposed to test solutions containing different concentrations of clothianidin**  
144 **daily for 7 days.** Black = 0ppb; red= 5 ppb; green = 7 ppb; blue = 10ppb. A Mantel-Cox Log-  
145 rank analysis was used to test for differences in survival between each treatment group relative  
146 to the 0ppb control group over the 7-day period. \*\*,  $p<0.0001$ .

147

148

149 **Table 1. Response of queen, worker, and male bumblebees (*Bombus impatiens*) to chronic**  
 150 **clothianidin exposure controlling for differences in body size and daily dose.** Workers and

151 males consumed 75  $\mu$ L of solution per day and due to their larger size, queens consumed 200  $\mu$ L

152 of each solution per day. Yellow shading = no effect on survival; blue shading = reduced survival.

153 All values are shown as mean  $\pm$  SD.

|                | Concentration of clothianidin solution |                            |                     |                            |                     |                            |
|----------------|----------------------------------------|----------------------------|---------------------|----------------------------|---------------------|----------------------------|
|                | 5ppb(ng/mL)                            |                            | 7ppb(ng/mL)         |                            | 10ppb(ng/mL)        |                            |
|                | Body mass (g)                          | Intake rate (ng/g.bee/day) | Body mass(g)        | Intake rate (ng/g.bee/day) | Body mass (g)       | Intake rate (ng/g.bee/day) |
| <b>Queens</b>  | 0.58 $\pm$ 0.1<br>3                    | 1.79 $\pm$ 0.39            | 0.59 $\pm$ 0.1<br>1 | 2.45 $\pm$ 0.48            | 0.57 $\pm$ 0.1<br>1 | 3.61 $\pm$ 0.71            |
| <b>Workers</b> | 0.16 $\pm$ 0.0<br>5                    | 2.60 $\pm$ 0.83            | 0.15 $\pm$ 0.0<br>4 | 3.85 $\pm$ 1.6             | 0.15 $\pm$ 0.0<br>4 | 5.48 $\pm$ 1.95            |
| <b>Males</b>   | 0.14 $\pm$ 0.0<br>4                    | 2.94 $\pm$ 0.86            | 0.14 $\pm$ 0.0<br>4 | 4.01 $\pm$ 1.08            | 0.13 $\pm$ 0.0<br>3 | 6.05 $\pm$ 1.35            |

154

155

156 Similar to workers and queens, males consuming the 10 ppb clothianidin solution (mean

157 intake rate  $\pm$  SD = 6.05  $\pm$ 1.35 ng/g·bee/day) had reduced survival compared to the 0ppb control

158 ( $X^2=38.8$ , df=1,  $P<0.0001$ ); however, the test population reached 50% mortality after just 3 days.

159 In addition, males consuming clothianidin at a concentration of 7 ppb (mean intake rate  $\pm$  SD =

160 4.01  $\pm$ 1.08 ng/g·bee/day) showed reduced survival compared to 0ppb controls ( $X^2=17.7$ , df=1,

161 P<0.0001), with the test population reaching 50% mortality at day 6. The vast majority of queens,  
162 workers, and males fully consumed the clothianidin solutions during testing (Table S1), indicating  
163 that differences in mortality were caused by differences in the toxicity effects of clothianidin rather  
164 than starvation (anti-feeding behavior).

165

## 166 **Sex differences in the transcriptomic response of bumblebees to sub-** 167 **lethal doses of clothianidin**

168 RNAseq analysis revealed that chronic oral exposure to clothianidin at a sub-lethal  
169 concentration of 5ppb for 5 days affected expression of 147 genes in workers and 200 genes in  
170 males. Of the 347 pooled clothianidin-induced genes (147 worker, 200 male), only 15 were  
171 present in both sexes, yielding a total of 332 unique clothianidin-induced genes. Of these genes,  
172 100 were classified as having a putative role in detoxification and the other 232 were associated  
173 with other biological functions (Tables 2, S2, and S3).

174

175 **Table 2. Sex-specific expression of inducible detoxification genes in bumblebee workers**  
176 **and males orally exposed to clothianidin at a sub-lethal daily dose over 5 consecutive**  
177 **days.** Phase 1 detoxification processes include oxidation, hydrolysis, and reduction reactions  
178 while Phase 2 processes include conjugation reactions. Expression levels were determined  
179 through RNAseq analysis. Upper portion = genes with increased expression in workers; lower  
180 portion = genes with increased expression in males. Clothianidin-inducible genes were initially  
181 identified by comparing transcriptomic expression patterns between individuals fed either 5ppb  
182 clothianidin solution or the same volume of solution containing 1.4% DMSO (vehicle control)  
183 solution separately for each sex and then pooling genes with significantly altered expression  
184 together.



| <b>DETOXIFICATION GENES: INCREASED EXPRESSION IN WORKERS VERSUS MALES</b> |                |                      |                                                   |              |
|---------------------------------------------------------------------------|----------------|----------------------|---------------------------------------------------|--------------|
| <b>Gene ID</b>                                                            | <b>P-value</b> | <b>Fold increase</b> | <b>Annotation</b>                                 | <b>Phase</b> |
| BIMP10198                                                                 | 0.001          | 6.07                 | cytochrome P450 6k1-like                          | 1            |
| BIMP23510                                                                 | 0.021          | 2.45                 | cytochrome P450 306a1                             | 1            |
| BIMP20393                                                                 | 0.013          | 1.85                 | dipeptidase 1                                     | 1            |
| BIMP19106                                                                 | 0.004          | 1.84                 | fatty-acid amide hydrolase 2-like                 | 1            |
| BIMP24166                                                                 | 0.011          | 1.71                 | U6 snRNA phosphodiesterase                        | 1            |
| BIMP18394                                                                 | 0.019          | 1.69                 | N-sulphoglucosamine sulphohydrolase               | 1            |
| BIMP11124                                                                 | 0.021          | 1.63                 | probable cation-transporting ATPase 13A3          | 1            |
| BIMP13907                                                                 | 0.048          | 1.46                 | ribonuclease P protein subunit p25-like protein   | 1            |
| BIMP18346                                                                 | 0.027          | 1.45                 | cholinesterase transcript variant X3              | 1            |
| BIMP18541                                                                 | 0.020          | 1.40                 | short-chain dehydrogenase family 16C member 6     | 1            |
| BIMP10339                                                                 | 0.005          | 3.25                 | probable serine/threonine-protein kinase yaka     | 2            |
| BIMP12444                                                                 | 0.023          | 3.12                 | hydroxymethylglutaryl-CoA synthase 1              | 2            |
| BIMP18546                                                                 | 0.011          | 2.12                 | putative glycerol kinase 5                        | 2            |
| BIMP13921                                                                 | 0.029          | 1.82                 | lymphokine-activated killer T-cell protein kinase | 2            |
| BIMP18798                                                                 | 0.033          | 1.67                 | probable deoxyhypusine synthase                   | 2            |
| BIMP21529                                                                 | 0.027          | 1.48                 | death-associated protein kinase 1-like            | 2            |
| BIMP17254                                                                 | 0.046          | 1.44                 | glycerol kinase                                   | 2            |
| <b>DETOXIFICATION GENES: INCREASED EXPRESSION IN MALES VERSUS WORKERS</b> |                |                      |                                                   |              |
| <b>Gene ID</b>                                                            | <b>P-value</b> | <b>Fold increase</b> | <b>Annotation</b>                                 | <b>Phase</b> |
| BIMP23965                                                                 | 0.003          | 5.66                 | lysozyme 2-like                                   | 1            |

|           |       |      |                                                |   |
|-----------|-------|------|------------------------------------------------|---|
| BIMP20243 | 0.030 | 5.61 | alkaline phosphatase 4-like                    | 1 |
| BIMP21241 | 0.001 | 4.86 | phospholipase A2-like                          | 1 |
| BIMP16635 | 0.019 | 3.97 | probable cytochrome P450 304a1                 | 1 |
| BIMP17003 | 0.021 | 3.47 | cytochrome P450 6k1-like                       | 1 |
| BIMP22299 | 0.024 | 1.83 | inosine-5'-monophosphate dehydrogenase 1b-like | 1 |
| BIMP23899 | 0.008 | 1.62 | sarcosine dehydrogenase mitochondrial          | 1 |
| BIMP14887 | 0.015 | 2.39 | glutathione S-transferase 1-1                  | 2 |

185

186

187

188           Only 77 of the 332 clothianidin-sensitive genes were differentially expressed between  
189 workers and males: 48 genes had higher expression in workers and 29 genes had higher  
190 expression in males. Of these 77 genes, only 25 were associated with detoxification processes  
191 17 (10 Phase 1 and 7 Phase 2) had higher expression in workers and 8 (7 Phase 1 and 1 Phase  
192 2) had higher expression in males (Table 2; Fig 3). Of the remaining 52 genes associated with  
193 biological functions other than detoxification, 31 genes had higher expression in workers and 21  
194 genes had higher expression in males. Biological functions, fold changes, and accession  
195 numbers for these 52 genes are shown in Table S2. Although many of these genes may play  
196 some as yet unknown functional role in detoxification, currently known biological functions include  
197 immunity, learning and memory, reproduction, and signal transduction. We also found eight  
198 genes whose function we could not identify based on current databases. Information for the  
199 255/332 clothianidin-inducible genes with conserved expression between workers and males are  
200 provided in Table S3.

201

202 **Fig 3. Heatmap showing the 25 putative detoxification genes that were differentially**  
203 **expressed between workers and males after 5 consecutive days of oral exposure to**  
204 **clothianidin.** Phase 1 detoxification processes include oxidation, hydrolysis, and reduction  
205 reactions while Phase 2 processes include conjugation reactions. Legend on the right shows  
206 relative fold change corresponding to each color.

207

208

## 209 Discussion

210 The present study shows that chronic consumption of field-realistic doses of the widely  
211 used neonicotinoid pesticide clothianidin has differential effects on the survival of queen, worker,  
212 and male bumblebees. Controlling for body size, queens and males consuming clothianidin at an  
213 average rate of 3.6 and 4.0 ng clothianidin/g·bee/day, respectively, had reduced survival over a  
214 7-day period whereas a similar average consumption rate in workers (3.9 ng/g·bee/day) had no  
215 mortality effect. Although clothianidin reduced queen and male survival at similar daily  
216 consumption rate, only male test populations reached 50% mortality over the testing period,  
217 indicating that chronic oral lethality effects for clothianidin are slightly greater in males than  
218 queens. The observed mortality response of all test groups to chronic clothianidin consumption  
219 cannot be attributed to a starvation effect as food avoidance and vomiting behaviors were not  
220 observed during the testing period. Collectively, these findings demonstrate that queens and  
221 males are much more vulnerable to clothianidin toxicity effects than workers, highlighting the  
222 importance of incorporating queen and male survival assays into current colony-focused ‘higher  
223 tier’ protocols for assessing the potential risk of various neonicotinoid formulations to wild  
224 pollinator populations [19]. In addition, the observed reductions in survival in *B. impatiens* workers  
225 chronically consuming clothianidin at a concentration of 10ppb is notably less than the 20ppb

226 chronic lethality threshold reported for worker honeybees [26] as well as the 25ppb threshold  
227 reported for workers of the European bumblebee species *B. terrestris* [27], indicating that chronic  
228 oral lethality effects of clothianidin are relatively high in *B. impatiens*. Our findings thus add to the  
229 rapidly growing body of evidence that neonicotinoid oral toxicity effects can vary considerably  
230 among insect pollinator species [28-31].

231 In addition to increasing mortality, chronic oral exposure to clothianidin over a short time  
232 period (5 days) was found to have profound sub-lethal effects on workers and males at the  
233 genomic level, altering expression of a total of 332 genes associated with a wide variety of  
234 biological functions, including immunity, neuronal signal transduction, locomotion, reproduction,  
235 and several fundamental cellular processes (Tables 2, S2, and S3). These results are consistent  
236 with a growing number of studies at the organismal level showing that neonicotinoids can have  
237 substantial sub-lethal effects on pollinators [32-36]. For example, clothianidin consumption  
238 induced changes to genes associated with reproductive output in males such as outer dense fiber  
239 protein 3-like and lutropin-choriogonadotropic hormone receptor-like (Table 2), which is  
240 consistent with previous work showing that oral exposure to imidacloprid reduced sperm viability  
241 in males bees by 50% [37]. Under natural conditions, chronic exposure to low doses of  
242 clothianidin in wildflower nectar thus has the potential to influence the dynamics of wild bumblebee  
243 populations by reducing male and queen reproductive capacity and at slightly higher doses,  
244 reducing the number of mating individuals in the fall and the number of queens establishing nests  
245 in the spring.

246 Somewhat surprisingly, the genomic response of workers and males to sub-lethal  
247 clothianidin doses did not provide unequivocal evidence that the haploid genetic status of males  
248 renders them less able to cope with oral clothianidin exposure. Of the 100 putative detoxification  
249 genes that were affected by clothianidin, 75 had a similar expression level in workers and males.  
250 These similarly expressed genes included many 'classic' detoxification genes such as cytochrome  
251 P450s, glutathione S-transferases, and carboxylesterases [38]. There was, however, a strong

252 sex bias in direction predicted by the haploid susceptibility hypothesis for the 25 remaining  
253 clothianidin-induced detoxification genes that differed between the sexes. Compared to males,  
254 workers had higher expression in more than twice genes associated with Phase 1 hydrolysis  
255 reactions and remarkably, higher expression in seven times as many genes associated with  
256 Phase 2 conjugation reactions. The fact that workers and males had a similar number of highly  
257 expressed Phase 1 genes related to oxidation-reduction reactions suggests that they were equally  
258 capable of initially breaking down clothianidin into intermediate metabolites, but differed in the  
259 capacity to subsequently transform such metabolites into non-toxic compounds (Phase 2  
260 reactions). These results are similar to those reported for constitutively expressed detoxification  
261 genes in *B. huntii* [25], which is closely related to *B. impatiens*. However, it must be noted that Xu  
262 et al. identified over 250 constitutively expressed genes for conjugation compared to the 18  
263 inducible genes found in the present study. Thus, despite the fact that there were substantial  
264 differences in the mortality response to oral clothianidin exposure, they were not strongly  
265 correlated with the number and expression of inducible detoxification genes. Of course it is  
266 possible that haploidy in males results in the reduced expression of few key genes in the  
267 clothianidin detoxification pathway, but further genetic manipulation experiments are required to  
268 determine whether or not this is the case.

269         The present work demonstrates the potential conservation benefits of using a genomic  
270 approach to quantify exposure of individual pollinators to extremely low doses of neonicotinoids,  
271 an idea that has been recently advocated by others [39]. Currently, one of the major problems  
272 with studying neonicotinoid effects on wild bee populations is that individual tissue samples have  
273 concentrations that are too low to be quantified with a high level of accuracy and reliability using  
274 conventional methodology and instrumentation. Indeed, the main laboratory at the United States  
275 Department of Agriculture responsible for measuring neonicotinoid levels in tissue samples was  
276 unable to detect clothianidin in our 5ppb in test solution, yet it produced a robust genetic response  
277 in both males and workers. To address this problem, the current study has identified a set of

278 clothianidin-induced genes that could potentially be used to develop highly sensitive ‘eco-tools’  
279 for assessing neonicotinoid exposure wild bumblebee populations. Such tools could also be used  
280 to gauge sub-lethal effects on behavior (e.g. reduced cognitive function) and physiology (e.g.  
281 reduced sperm production), which are often difficult to assess in the field at the organismal level.  
282 Comparative genomic approaches would also provide unique insight into why chronic oral toxicity  
283 levels for neonicotinoids vary considerably among (and within) wild bees species [31], greatly  
284 accelerating efforts to determine the impact of neonicotinoid use on wild pollinators and the global  
285 biodiversity that they ultimately support.

286

## 287 **Materials and Methods**

### 288 **Experimental Design**

289 **Bumble bees:** Virgin queens, workers, males were obtained from commercial *Bombus*  
290 *impatiens* colonies (Biobest Biological Systems, Leamington, Canada). Colonies initially  
291 contained approximately 100 workers and were subsequently supplied with 30% (stock) sugar  
292 solution (Grade A pure honey mixed with distilled water to the desired concentration, measured  
293 with a Bellingham & Stanley hand-held refractometer (Suwanee, USA)) and wildflower pollen *ad*  
294 *libitum* to facilitate continued production of workers and later production of queens and males.  
295 Multiple colonies were used across experimental trials to control for potential inter-colony  
296 differences in clothianidin sensitivity.

297 For chronic oral toxicity tests, queen, worker and male bees were collected and placed in  
298 a 4°C refrigerator. Once immobile, individuals were weighed to the nearest milligram, marked  
299 with acrylic paint for identification, and then placed in a 16oz plastic housing container with a  
300 screen lid for ventilation (Fig S1). Each lid had a circular opening with a removable plastic plug  
301 that was positioned directly above a plastic ‘feeding bowl’ fastened to the bottom of the container.

302 In this way, test solutions could be dispensed into the bowls with minimal disturbance to the bee.  
303 Each container was also supplied with 1-1.5 grams of a pollen paste (a dough-like mixture of and  
304 stock sugar solution), which was replaced as necessary.

305 All housing containers were kept in Percival Scientific (Perry, USA) environmental  
306 chambers set to 22-25°C, 50 % humidity, and a 12 hour light/dark cycle. Bees were fed 75 µL  
307 (workers and males) or 200 µL (queens) of untreated stock sugar solution once daily within 3  
308 hours of the start of the light cycle. Preliminary experiments with stock sugar solution determined  
309 that these volumes are completely consumed by individuals over a 24-hour period while having  
310 no effect on survival or activity level. All handling of housing containers was conducted under red  
311 light in order to minimize additional stress on test bees.

312

313 **Clothianidin Solutions:** Analytical-grade clothianidin (Sigma-Aldrich, USA) was  
314 dissolved in dimethyl sulfoxide (DMSO), as has been done in other neonicotinoid toxicity studies  
315 [40], to a concentration of  $5 \times 10^6$  ng/mL or ppb (parts per billion) and serially diluted down to  $5 \times$   
316  $10^2$  or  $5 \times 10^1$  ppb. Diluted clothianidin solution was added to stock sugar solution to create feeding  
317 solutions of 10, 7, and 5 ppb (ng/mL). Concentrations of clothianidin selected were well within the  
318 range present under field conditions [41]. Drug mixtures were prepared within 2 days of the start  
319 of a trial, stored in conical tubes in the dark at 4°C and only taken out for immediate use.

320 To confirm that test solutions contained the correct amount of clothianidin, fresh samples  
321 of 0, 5, 7, and 10 ppb test solutions (were sent to the U.S.D.A. Agricultural Marketing Service's  
322 National Science Laboratories Testing Division (Gastonia, USA). Clothianidin residues were  
323 measured using Mass Spectrometry with a LOQ of 5 +/- 1 ppb. Although the 5ppb test solution  
324 was below the minimal level of detection by the U.S.D.A. equipment, 7 and 10 ppb test solutions  
325 (3 technical replicates each) yielded mean values (+/-SE) of 4.1 +/- 3.5 and 7.3 +/-1.4 ppb,  
326 respectively.

327

## 328 **Test Procedure for feeding experiments**

329 Prior to each trial, all bees were fed stock sugar solution at the previously described volumes daily  
330 until there were no observed deaths over a 48-hour period. Individuals not consuming all of the  
331 sugar solution within a 24 hour period were also removed. This process ensured that bees were  
332 in good health prior to testing.

333 After the acclimation period, individuals were assigned to either the 0 ppb (control), 5 ppb,  
334 7ppb, or 10ppb treatment group, with colony origin and bee size balanced among groups.  
335 Location of housing containers within and between shelves inside the environmental chamber  
336 was randomized in order to control for potential positional effects on survival. Total number of  
337 bees tested at each clothianidin concentration was as follows: 208 at 0ppb (88 workers, 58 queens,  
338 62 males), 178 at 5ppb (70 workers, 58 queens, 50 males), 178 at 7 ppb (70 workers, 58 queens,  
339 50 males), and 264 at 10 ppb (108 workers, 84 queens, 72 males). These numbers were obtained  
340 through 11 independent worker, 8 queen, and 12 male trials, with bees in each trial obtained from  
341 at least two colonies. Given queens required a greater volume of test solution to remain active  
342 than workers and males due to their larger body size, we expressed exposure level for each group  
343 as ng clothianidin consumed per gram of bee per day (ng/g·bee/day). Mean ( $\pm$ SD) mass in grams  
344 for queens =  $0.58\pm 0.12$  g; workers =  $0.15\pm 0.05$  g; males =  $0.14\pm 0.04$  g. In this way, sex and  
345 caste differences in clothianidin sensitivity could be established while controlling for differences  
346 in body size and consumption rate.

347 Each day over a 7-day testing period, individual housing containers were removed from  
348 the environmental chamber within three hours after to the beginning of the light cycle, and the  
349 number of dead bees was recorded. In the rare case that a test individual was not dead but  
350 showed inverted orientation, extremity spasms, and unresponsiveness, it was recorded as dead  
351 and euthanized. Presence/absence of test solutions was also checked daily and feeding bowls



352 were replenished. Immediately following data collection, bees were returned to the environmental  
353 chamber.

354 To confirm that consumption of dimethyl sulfoxide (DMSO) at the concentration used in  
355 experiments had no effect on survival of queens, workers and males, additional feeding trials  
356 were conducted with stock sugar solution containing 1.4% DMSO. As in the clothianidin test trials,  
357 workers and males were fed 75  $\mu$ L of solution per day and queens were fed 200  $\mu$ L/day over a 7-  
358 day period. Survival in the control (0ppb) group (see above for numbers in each group) was then  
359 compared to survival in the 1.4% DMSO group for queens (24 treated individuals), workers (55  
360 treated individuals), and males (87 treated individuals). Results of Mantel-Cox Log-rank analyses  
361 revealed that consuming 1.4% DMSO for seven days had no effect on survival of queens ( $X^2=0.61$ ,  
362  $df=1$ ,  $P=0.43$ ), workers ( $X^2=0.26$ ,  $df=1$ ,  $P=0.60$ ) and males ( $X^2=0.08$ ,  $df=1$ ,  $P=0.77$ ).

363

364 **Statistical Analysis:** Survival data from each caste was compiled over the full 7-day  
365 clothianidin trial period. All remaining survivors were censored. For each clothianidin  
366 concentration, Kaplan-Meier survival curves [42] were generated for queens, workers, and males  
367 in GraphPad Prism 6 (La Jolla, USA) and a Mantel-Cox Log-rank analysis was used to test for  
368 differences in survival rates across all treatment groups and when significant, survival between a  
369 single clothianidin concentration and the 0ppb control.

370

## 371 **Test procedure for RNAseq analysis**

372 To test the haploid susceptibility hypothesis that males have fewer gene products available to  
373 detoxify clothianidin than workers, RNAseq analysis was used to conduct genome-wide  
374 transcriptome analysis of workers and males after consumption 75 $\mu$ L of either the 5ppb test  
375 solution (0.374ng/bee; 3 workers and 3 males) or 1.4% DMSO in stock sugar solution (vehicle  
376 control; 3 workers and 3 males) once a day for 5 consecutive days. This clothianidin dose was

377 selected because it did not reduce worker and male survival in our initial series of feeding  
378 experiments.

379

380 **Treatment and sample preparation:** Individuals were euthanized at -20°C 24 hours  
381 after the last dose (day 6), immediately dissected on ice by removing legs, wings, and proboscis,  
382 and transferred to -80°C until ready for extraction. (This entire process was performed as quickly  
383 as possible to minimize RNA degradation, usually completed within 5 minutes.) Individual sample  
384 extractions were completed in an RNA-specified biosafety cabinet by crushing the bee body  
385 through pestle homogenization in Trizol (ThermoFischer Scientific, USA) following the suppliers  
386 recommendations for RNA isolation followed by chloroform phase separation. The aqueous  
387 phase containing RNA was collected, then purified using a PureLink RNA Mini Kit (ThermoFischer  
388 Scientific, USA), ending with a 30 uL elution step. Concentration and purity (A260/280 and  
389 A260/230) were measured using Nanodrop. Purified RNA was stored at -80°C until use.

390

391 **RNA Sequencing:** Purified RNA samples were diluted to 100ng/uL in sterile, DNase-free,  
392 RNase-free water and then shipped to Quick Biology (Pasadena, USA) for processing. Libraries  
393 for RNA-Seq were prepared with a KAPA Stranded RNA-Seq Kit. The workflow consisted of  
394 mRNA enrichment, cDNA generation, and end repair to generate blunt ends, A-tailing, adaptor  
395 ligation and PCR amplification. Different adaptors were used for multiplexing samples in one lane.  
396 Sequencing was performed on Illumina Hiseq3000/4000 for a pair end 150 run. Data quality check  
397 was done on an Illumina SAV (San Diego, USA). De-multiplexing was performed with Illumina  
398 Bcl2fastq2 v 2.17 program. Reads were first mapped to the latest UCSC transcript set using STAR  
399 version 2.4.1d and the gene expression level was quantified using an E/M algorithm in Partek  
400 Genomics Suite (Partek, Inc. USA). Gene expression levels were normalized to total counts.

401 All four experimental groups produced a similar number of mean total reads: worker

402 controls  $4.951 \times 10^6 \pm 1.845 \times 10^5$ , worker clothianidin  $5.147 \times 10^6 \pm 4.004 \times 10^5$ , male controls  
403  $5.520 \times 10^6 \pm 8.654 \times 10^4$ , and male clothianidin  $5.889 \times 10^6 \pm 1.168 \times 10^5$ . Reads were aligned to the  
404 BIMP\_2.0 genome [43], resulting a high mean percentage of alignment in all four groups: worker  
405 control  $73.20\% \pm 3.35$ , worker clothianidin  $80.41\% \pm 1.573$ , male control  $79.15\% \pm 1.511$ , male  
406 clothianidin  $77.58\% \pm 1.938$ , corresponding with 15,896 identified genes. RNA sequencing data  
407 quality and alignment for sex and treatment are shown in Table S4.

408

409 **Statistical Analysis:** Normalized gene expression levels were compared between groups  
410 using the differential gene expression (GSA) algorithm in Partek Genomics Suite (Partek, Inc.,  
411 USA). To initially isolate all putative detoxification genes induced by clothianidin consumption,  
412 test and vehicle control gene expression patterns were compared separately for each sex. A  
413 gene was considered to be differentially expressed if comparisons yielded both a p-value less  
414 than 0.05 and a fold change greater than 1.5. All differentially expressed genes in workers and  
415 males were then pooled to create a list of genes with clothianidin-induced expression.

416 To test for sex differences in the expression level of pooled clothianidin-induced genes,  
417 expression levels were then compared between workers and males in the test group (bees  
418 chronically exposed to clothianidin at concentration of 5ppb). For this comparison, a gene was  
419 considered to have sex-specific expression if  $P < 0.05$ . Genes with this significance threshold were  
420 then categorized as being involved in either Phase I (oxidation, hydrolysis and reduction) or Phase  
421 II (conjugation with sugars, glutathione, amino acids, etc.) detoxification or assigned to some other  
422 biological process. This method of identifying and categorizing putative detoxification genes has  
423 been used previously in bumblebees and other insects [25] and [44]. Genes were assigned a  
424 particular biological processes based on information from the UniProt online gene database  
425 (<http://www.uniprot.org/>).

426

427 **Acknowledgements:**

428 **General:** We thank C. Emery and J. Letourneau for assistance with feeding and data collection.

429

430

431 **References**

432 1. Goulson D, Lye GC, Darvill B. Decline and conservation of bumble bees. *Annu Rev Entomol.*  
433 2008;53:191-208.

434 2. David A, Botías C, Abdul-Sada A, Nicholls E, Rotheray EL, Hill EM, et al. Widespread  
435 contamination of wildflower and bee-collected pollen with complex mixtures of neonicotinoids and  
436 fungicides commonly applied to crops. *Environment international.* 2016;88:169-78.

437 3. Cameron SA, Lozier JD, Strange JP, Koch JB, Cordes N, Solter LF, et al. Patterns of widespread  
438 decline in North American bumble bees. *Proceedings of the National Academy of Sciences.*  
439 2011;108(2):662-7.

440 4. Colla SR, Packer L. Evidence for decline in eastern North American bumblebees (Hymenoptera :  
441 Apidae), with special focus on *Bombus affinis* Cresson. *Biodiversity and Conservation.* 2008;17(6):1379-  
442 91. doi: 10.1007/s10531-008-9340-5. PubMed PMID: WOS:000256754200006.

443 5. Grixti JC, Wong LT, Cameron SA, Favret C. Decline of bumble bees (*Bombus*) in the North  
444 American Midwest. *Biological Conservation.* 2009;142(1):75-84. doi:  
445 <https://doi.org/10.1016/j.biocon.2008.09.027>.

446 6. Biesmeijer J, Roberts S, Reemer M, Ohlemüller R, Edwards M, Peeters T, et al. Parallel declines in  
447 pollinators and insect-pollinated plants in Britain and the Netherlands. *Science.* 2006;313(5785):351-4.

448 7. Memmott J, Waser NM, Price MV. Tolerance of pollination networks to species extinctions. *Proc*  
449 *R Soc B-Biol Sci.* 2004;271(1557):2605-11. doi: 10.1098/rspb.2004.2909. PubMed PMID:

- 450 WOS:000226419100011.
- 451 8. Wood TJ, Goulson D. The environmental risks of neonicotinoid pesticides: a review of the  
452 evidence post 2013. *Environmental Science and Pollution Research*. 2017;24(21):17285-325. doi:  
453 10.1007/s11356-017-9240-x. PubMed PMID: WOS:000406479200003.
- 454 9. Sheets LP, Li AA, Minnema DJ, Collier RH, Creek MR, Peffer RC. A critical review of neonicotinoid  
455 insecticides for developmental neurotoxicity. *Critical reviews in toxicology*. 2016;46(2):153-90.
- 456 10. Dively GP, Kamel A. Insecticide residues in pollen and nectar of a cucurbit crop and their  
457 potential exposure to pollinators. *Journal of agricultural and food chemistry*. 2012;60(18):4449-56.
- 458 11. Whiting SA, Strain KE, Campbell LA, Young BG, Lydy MJ. A multi-year field study to evaluate the  
459 environmental fate and agronomic effects of insecticide mixtures. *Science of The Total Environment*.  
460 2014;497-498:534-42. doi: <http://dx.doi.org/10.1016/j.scitotenv.2014.07.115>.
- 461 12. Main AR, Michel NL, Cavallaro MC, Headley JV, Peru KM, Morrissey CA. Snowmelt transport of  
462 neonicotinoid insecticides to Canadian Prairie wetlands. *Agriculture, Ecosystems & Environment*.  
463 2016;215:76-84. doi: <http://dx.doi.org/10.1016/j.agee.2015.09.011>.
- 464 13. Pecenka JR, Lundgren JG. Non-target effects of clothianidin on monarch butterflies. *Science of*  
465 *Nature*. 2015;102(3-4). doi: 10.1007/s00114-015-1270-y. PubMed PMID: WOS:000355942200007.
- 466 14. Gels JA, Held DW, Potter DA. Hazards of insecticides to the bumble bees *Bombus impatiens*  
467 (Hymenoptera : Apidae) foraging on flowering white clover in turf. *Journal of Economic Entomology*.  
468 2002;95(4):722-8. doi: 10.1603/0022-0493-95.4.722. PubMed PMID: WOS:000177448000010.
- 469 15. Blacquiere T, Smagghe G, Van Gestel CA, Mommaerts V. Neonicotinoids in bees: a review on  
470 concentrations, side-effects and risk assessment. *Ecotoxicology*. 2012;21(4):973-92.
- 471 16. Krupke CH, Hunt GJ, Eitzer BD, Andino G, Given K. Multiple routes of pesticide exposure for  
472 honey bees living near agricultural fields. *PLoS One*. 2012;7(1):e29268.
- 473 17. Bonmatin J-M, Giorio C, Girolami V, Goulson D, Kreuzweiser DP, Krupke C, et al. Environmental

- 474 fate and exposure; neonicotinoids and fipronil. *Environmental Science and Pollution Research*.  
475 2015;22(1):35-67. doi: 10.1007/s11356-014-3332-7.
- 476 18. de Perre C, Murphy TM, Lydy MJ. Fate and effects of clothianidin in fields using conservation  
477 practices. *Environmental toxicology and chemistry / SETAC*. 2015;34(2):258-65. Epub 2014/11/08. doi:  
478 10.1002/etc.2800. PubMed PMID: 25376402.
- 479 19. Cabrera AR, Almanza MT, Cutler GC, Fischer DL, Hinarejos S, Lewis G, et al. Initial  
480 recommendations for higher-tier risk assessment protocols for bumble bees, *Bombus* spp.  
481 (Hymenoptera: Apidae). *Integrated Environmental Assessment and Management*. 2016;12(2):222-9. doi:  
482 doi:10.1002/ieam.1675.
- 483 20. Devillers J, Decourtye A, Budzinski H, Pham-Delègue MH, Cluzeau S, Maurin G. Comparative  
484 toxicity and hazards of pesticides to Apis and non-Apis bees. A chemometrical study. SAR and QSAR in  
485 *Environmental Research*. 2003;14(5-6):389-403. doi: 10.1080/10629360310001623980.
- 486 21. O'Donnell S. The role of male disease susceptibility in the evolution of haplodiploid insect  
487 societies *Proceedings of the Royal Society B: Biological Sciences*. 2004;271(1542):979-83. doi:  
488 10.1098/rspb.2004.2685.
- 489 22. Heinrich B. *Bumblebee Economics*: Harvard University Press; 1979.
- 490 23. Heinrich B, Heinrich MJE. Size and Caste in Temperature Regulation by Bumblebees.  
491 *Physiological Zoology*. 1983;56(4):552-62.
- 492 24. Thompson HM, Wilkins S, Harkin S, Milner S, Walters KFA. Neonicotinoids and bumblebees  
493 (*Bombus terrestris*): effects on nectar consumption in individual workers. *Pest Management Science*.  
494 2015;71(7):946-50. doi: 10.1002/ps.3868.
- 495 25. Xu J, Strange JP, Welker DL, James RR. Detoxification and stress response genes expressed in a  
496 western North American bumble bee, *Bombus huntii* (Hymenoptera: Apidae). *BMC Genomics*.  
497 2013;14:874. Epub 2013/12/18. doi: 10.1186/1471-2164-14-874. PubMed PMID: 24330608; PubMed

- 498 Central PMCID: PMC3878831.
- 499 26. Alkassab AT, Kirchner WH. Impacts of chronic sublethal exposure to clothianidin on winter  
500 honeybees. *Ecotoxicology*. 2016;25(5):1000-10. doi: 10.1007/s10646-016-1657-3.
- 501 27. Spurgeon D, Hesketh H, Lahive E, Svendsen C, Baas J, Robinson A, et al. Chronic oral lethal and  
502 sub-lethal toxicities of different binary mixtures of pesticides and contaminants in bees (*Apis mellifera*,  
503 *Osmia bicornis* and *Bombus terrestris*). *EFSA Supporting Publications*. 2016;13(9):1076E-n/a. doi:  
504 10.2903/sp.efsa.2016.EN-1076.
- 505 28. Abbott V, Nadeau J, Higo H, Winston M. Lethal and sublethal effects of imidacloprid on *Osmia*  
506 *lignaria* and clothianidin on *Megachile rotundata* (Hymenoptera: Megachilidae). *Journal of Economic*  
507 *Entomology*. 2008;101(3):784-96.
- 508 29. Scott-Dupree CD, Conroy L, Harris C. Impact of currently used or potentially useful insecticides  
509 for canola agroecosystems on *Bombus impatiens* (Hymenoptera: Apidae), *Megachile rotundata*  
510 (Hymenoptera: Megachilidae), and *Osmia lignaria* (Hymenoptera: Megachilidae). *Journal of Economic*  
511 *Entomology*. 2009;102(1):177-82.
- 512 30. Cresswell JE, Desneux N, vanEngelsdorp D. Dietary traces of neonicotinoid pesticides as a cause  
513 of population declines in honey bees: an evaluation by Hill's epidemiological criteria. *Pest management*  
514 *science*. 2012;68(6):819-27.
- 515 31. Arena M, Sgolastra F. A meta-analysis comparing the sensitivity of bees to pesticides.  
516 *Ecotoxicology*. 2014;23(3):324-34.
- 517 32. Di Prisco G, Cavaliere V, Annoscia D, Varricchio P, Caprio E, Nazzi F, et al. Neonicotinoid  
518 clothianidin adversely affects insect immunity and promotes replication of a viral pathogen in honey  
519 bees. *Proceedings of the National Academy of Sciences of the United States of America*.  
520 2013;110(46):18466-71. doi: 10.1073/pnas.1314923110. PubMed PMID: WOS:000326830900045.
- 521 33. Fauser-Misslin A, Sadd BM, Neumann P, Sandrock C. Influence of combined pesticide and

- 522 parasite exposure on bumblebee colony traits in the laboratory. *J Appl Ecol.* 2014;51(2):450-9. doi:  
523 10.1111/1365-2664.12188. PubMed PMID: WOS:000332835600018.
- 524 34. Wu JY, Anelli CM, Sheppard WS. Sub-lethal effects of pesticide residues in brood comb on  
525 worker honey bee (*Apis mellifera*) development and longevity. *PloS one.* 2011;6(2):e14720.
- 526 35. Rabhi KK, Esancy K, Voisin A, Crespin L, Le Corre J, Tricoire-Leignel H, et al. Unexpected effects of  
527 low doses of a neonicotinoid insecticide on behavioral responses to sex pheromone in a pest insect.  
528 *PLoS One.* 2014;9(12):e114411. Epub 2014/12/18. doi: 10.1371/journal.pone.0114411. PubMed PMID:  
529 25517118; PubMed Central PMCID: PMC4269385.
- 530 36. Decourtye A, Devillers J, Genecque E, Le Menach K, Budzinski H, Cluzeau S, et al. Comparative  
531 sublethal toxicity of nine pesticides on olfactory learning performances of the honeybee *Apis mellifera*.  
532 *Archives of environmental contamination and toxicology.* 2005;48(2):242-50.
- 533 37. Chaimanee V, Evans JD, Chen Y, Jackson C, Pettis JS. Sperm viability and gene expression in  
534 honey bee queens (*Apis mellifera*) following exposure to the neonicotinoid insecticide imidacloprid and  
535 the organophosphate acaricide coumaphos. *Journal of Insect Physiology.* 2016;89:1-8. doi:  
536 <http://dx.doi.org/10.1016/j.jinsphys.2016.03.004>.
- 537 38. Li X, Schuler MA, Berenbaum MR. Molecular Mechanisms of Metabolic Resistance to Synthetic  
538 and Natural Xenobiotics. *Annual Review of Entomology.* 2007;52(1):231-53. doi:  
539 10.1146/annurev.ento.51.110104.151104. PubMed PMID: 16925478.
- 540 39. Woodard SH, Lozier JD, Goulson D, Williams PH, Strange JP, Jha S. Molecular tools and bumble  
541 bees: revealing hidden details of ecology and evolution in a model system. *Molecular Ecology.*  
542 2015;24(12):2916-36. doi: 10.1111/mec.13198.
- 543 40. de Oliveira IM, Nunes BVF, Barbosa DR, Pallares AM, Faro LRF. Effects of the neonicotinoids  
544 thiametoxam and clothianidin on in vivo dopamine release in rat striatum. *Toxicology Letters.*  
545 2010;192(3):294-7. doi: <http://dx.doi.org/10.1016/j.toxlet.2009.11.005>.



- 546 41. Arce AN, David TI, Randall EL, Rodrigues AR, Colgan TJ, Wurm Y, et al. Impact of controlled  
547 neonicotinoid exposure on bumblebees in a realistic field setting. *J Appl Ecol.* 2017;54(4):1199-208. doi:  
548 10.1111/1365-2664.12792. PubMed PMID: WOS:000405534500020.
- 549 42. Kaplan EL, Meier P. Nonparametric Estimation from Incomplete Observations. *Journal of the*  
550 *American Statistical Association.* 1958;53(282):457-81. doi: 10.2307/2281868.
- 551 43. Sadd BM, Barribeau SM, Bloch G, de Graaf DC, Dearden P, Elsik CG, et al. The genomes of two  
552 key bumblebee species with primitive eusocial organization. *Genome Biol.* 2015;16. doi: ARTN 76  
553 10.1186/s13059-015-0623-3. PubMed PMID: WOS:000353676700001.
- 554 44. Schröder P, Collins C. Conjugating Enzymes Involved in Xenobiotic Metabolism of Organic  
555 Xenobiotics in Plants. *International Journal of Phytoremediation.* 2002;4(4):247-65. doi:  
556 10.1080/15226510208500086.

557

558

559

## 560 **Supporting Information**

561

562 **Fig S1. Schematic of setup for individual feeding assay.** Bees were isolated from the colony  
563 and housed in a 16oz plastic container with a feeding cup positioned directly under an open vent  
564 in the screen lid. Test sugar solutions were delivered through a hole in the lid with a micropipette.  
565 Individuals were supplied with pollen *ad libitum*.

566

567 **Table S1. Percent of alive queens, workers and males consuming test solutions**  
568 **(clothianidin concentration given in ppb) over the 7-day testing period.**

569 **Table S2. List of clothianidin-induced non-detoxification genes with increased expression**  
570 **in worker (W) and male (M) *Bombus impatiens*.** Biological process known to be associated  
571 with each gene is also shown.

572

573 **Table S3. List of clothianidin-induced genes showing a similar expression level in**  
574 **worker (W) and male (M) *Bombus impatiens*.**

575

576 **Table S4. RNA sequencing results and quality control.**

577

578

579

580

Figure 1

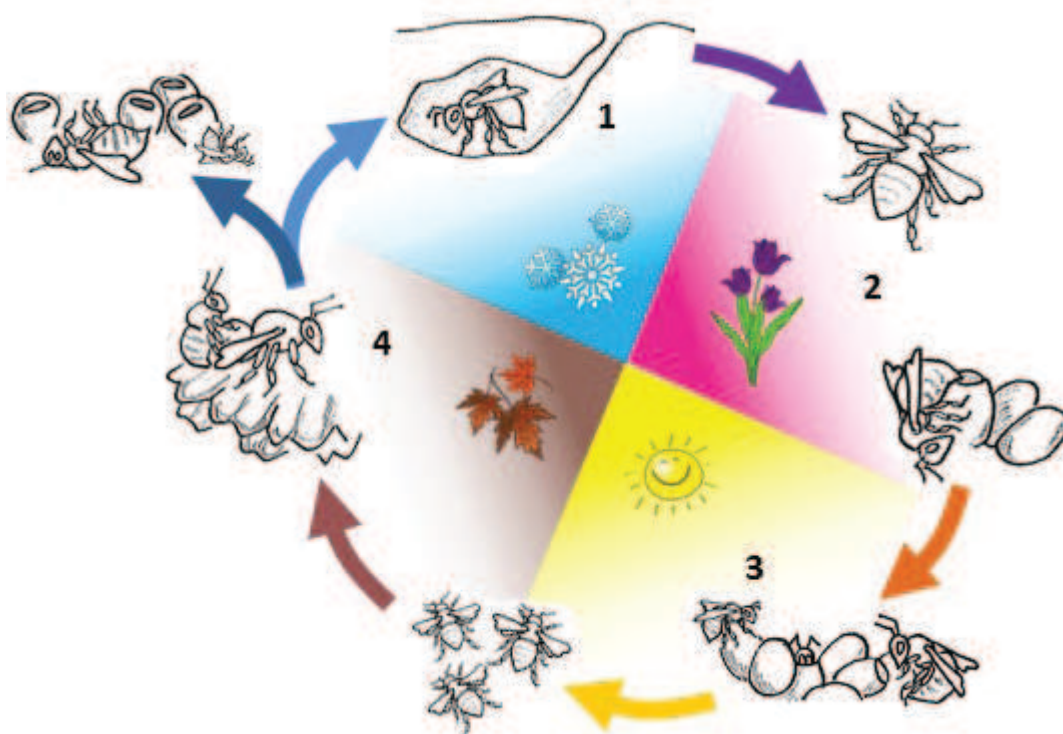

FIGURE 3

A) QUEENS

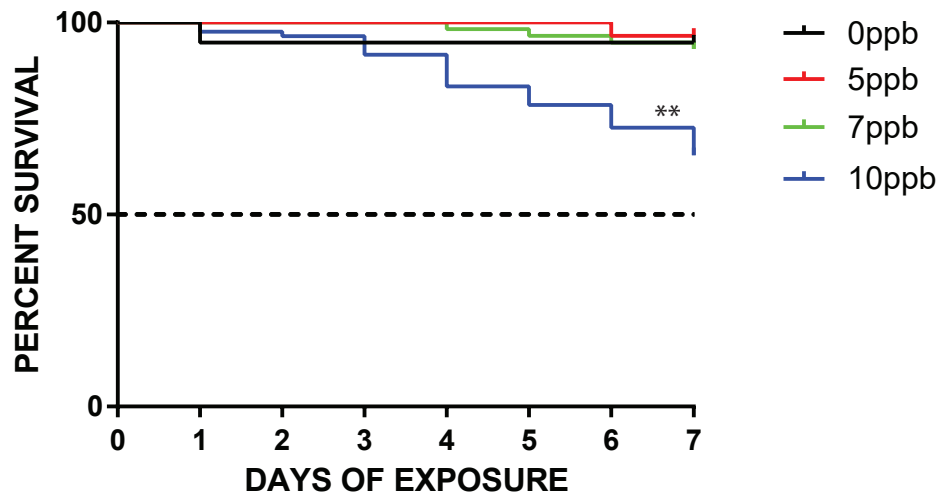

B) WORKERS

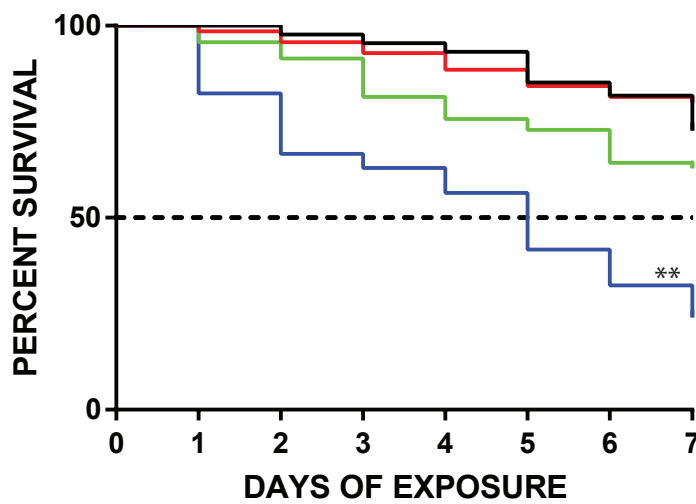

C) MALES

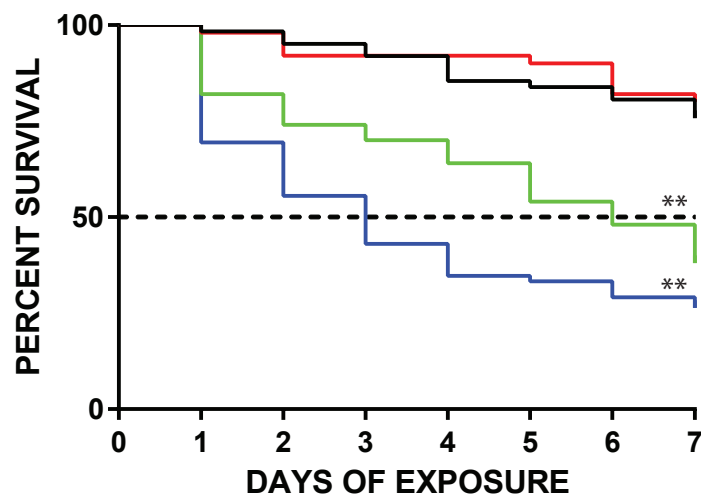

Figure 3

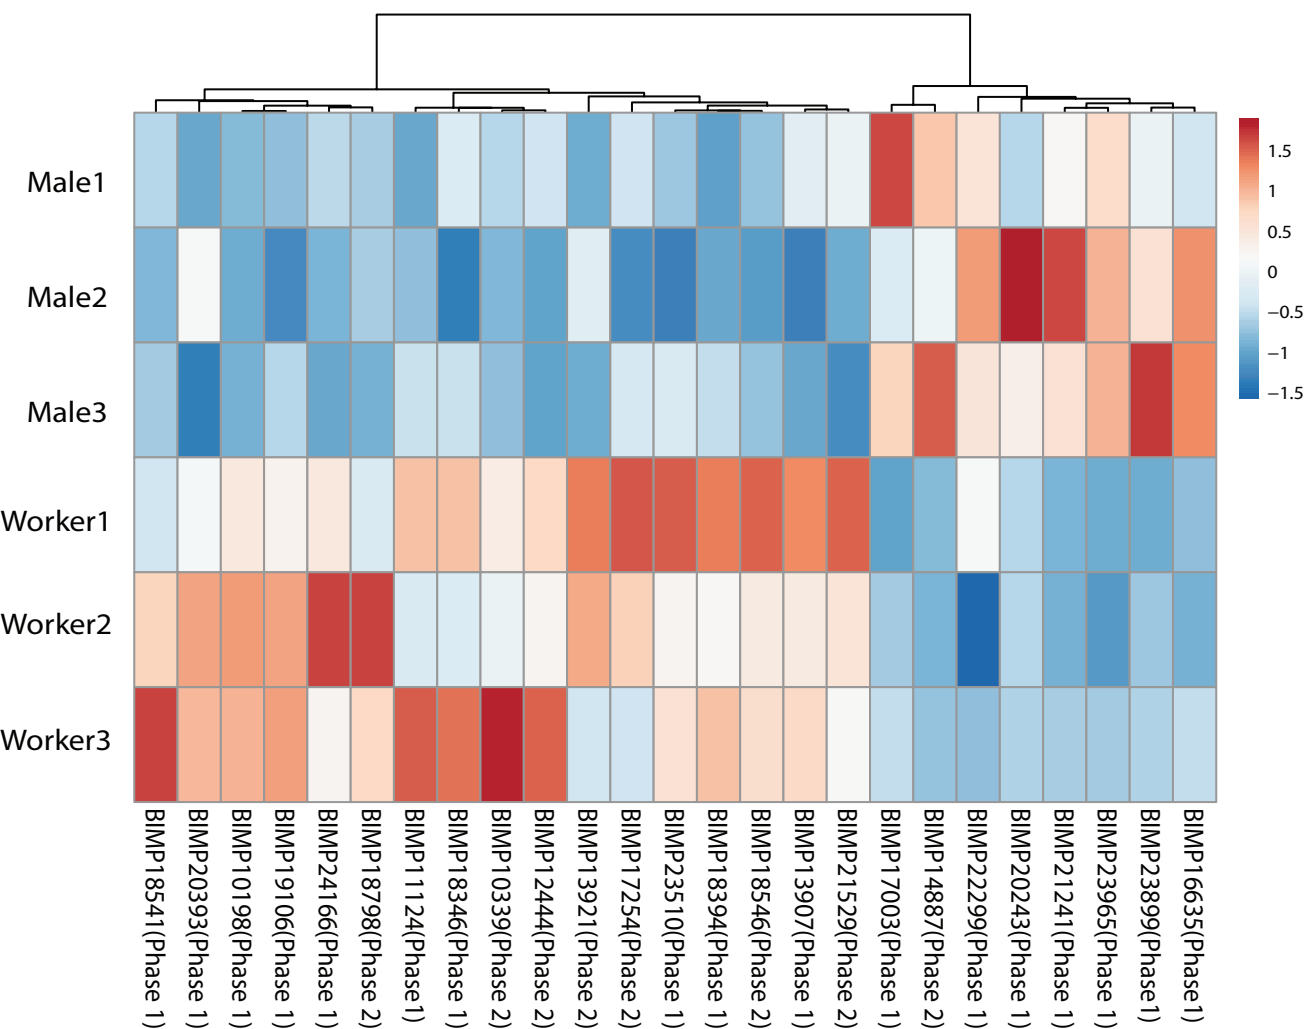

Source: http://biorxiv.org/content/10.1101/351809v1.full.pdf
